# Supplementary material for: Characteristic proteins in the plasma of postoperative colorectal and liver cancer patients with Yin deficiency of liver-kidney syndrome
Source: PubMed Central journal article supplement (PMC5732723; doi:10.18632/oncotarget.21735), 2017-10-11
Supplement: oncotarget-08-103223-s001.pdf [file oncotarget-08-103223-s001.pdf]

# Characteristic proteins in the plasma of postoperative colorectal and liver cancer patients with Yin deficiency of liver-kidney syndrome

## SUPPLEMENTARY MATERIALS

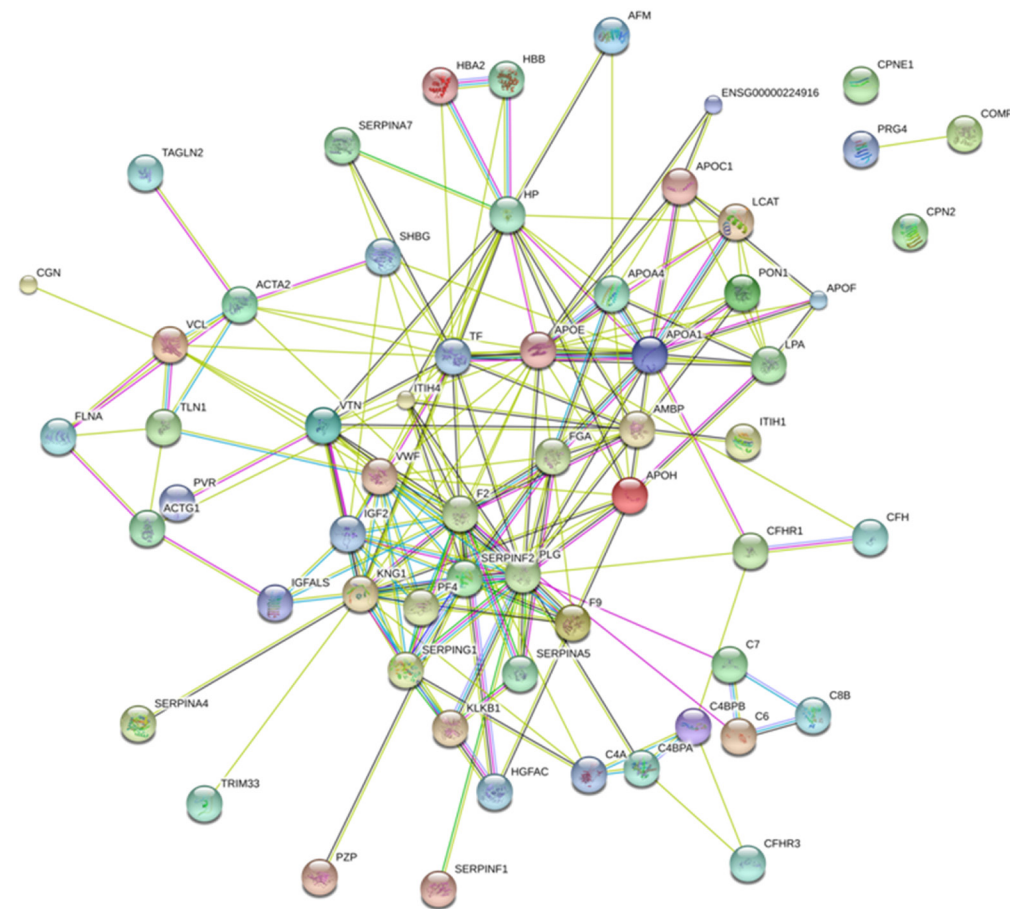

Supplementary Figure 1: Magnification of Figure 1D.



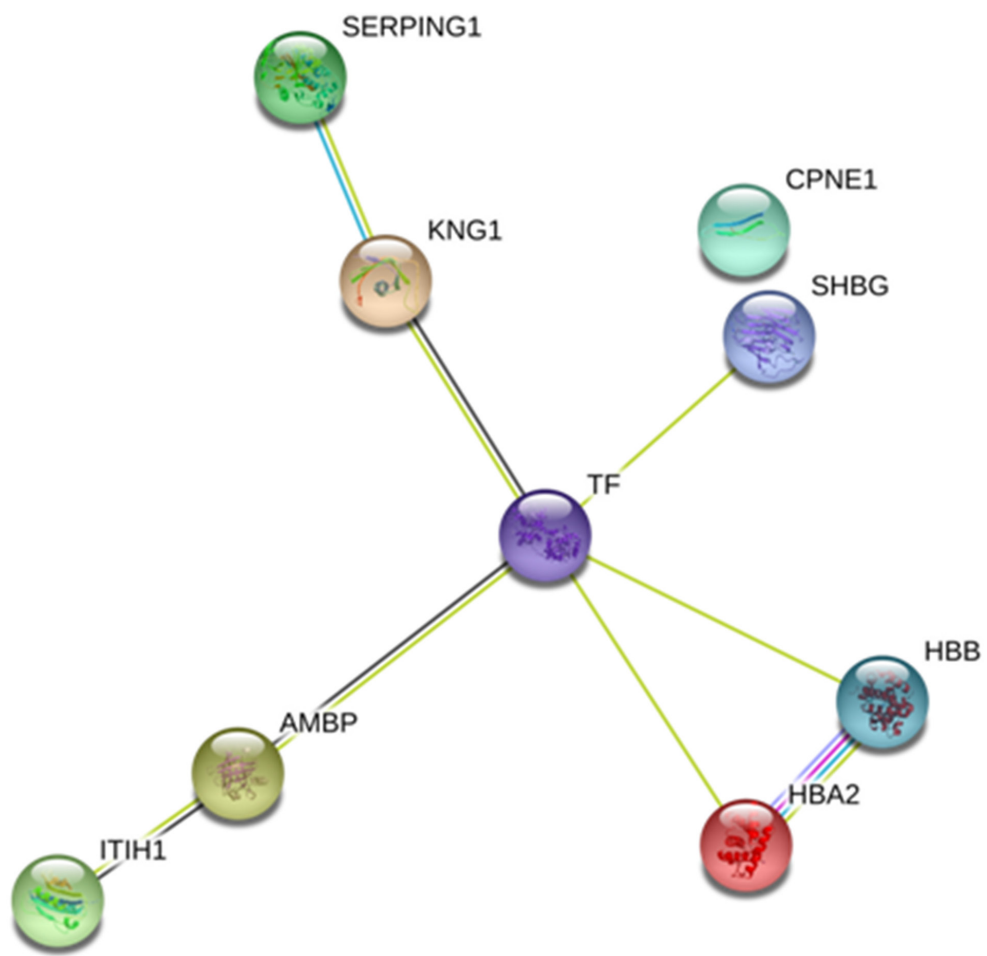

Supplementary Figure 3: Magnification of Figure 3D.

**Supplementary Table 1: All the 21 common DEPs in postoperative CRC and LC patients with YDLKS in compared with those of NS**

| <b>Gene ID</b> | <b>Protein names</b>                                    | <b>Gene names</b> |
|----------------|---------------------------------------------------------|-------------------|
| Q92954         | Proteoglycan 4 (Lubricin)                               | PRG4              |
| P15169         | Carboxypeptidase N catalytic chain (CPN)                | CPN1              |
| Q9P2M7         | Cingulin                                                | CGN               |
| P19827         | Inter-alpha-trypsin inhibitor heavy chain H1            | ITIH1             |
| O95445         | Apolipoprotein M (Apo-M)                                | APOM              |
| P04217         | Alpha-1B-glycoprotein                                   | A1BG              |
| Q8NET4         | Retrotransposon gag domain-containing protein 1         | RGAG1             |
| O75882         | Attractin (DPPT-L) (Mahogany homolog)                   | ATRN              |
| P68871         | Hemoglobin subunit beta (Beta-globin)                   | HBB               |
| P10643         | Complement component C7                                 | C7                |
| P02760         | Protein AMBP                                            | AMBP              |
| P01042         | Kininogen-1                                             | KNG1              |
| P69905         | Hemoglobin subunit alpha                                | HBA1              |
| P06681         | Complement C2                                           | C2                |
| P02654         | Apolipoprotein C-I (Apo-CI)                             | APOC1             |
| P05155         | Plasma protease SERPING1                                | SERPING1          |
| O75928         | E3 SUMO-protein ligase PIAS2                            | PIAS2             |
| P04206         | Ig kappa chain V-III region GOL (Rheumatoid factor)     |                   |
| P02787         | Serotransferrin (Transferrin)                           | TF                |
| Q9Y5Y7         | Lymphatic vessel endothelial hyaluronic acid receptor 1 | LYVE1             |
| P04278         | Sex hormone-binding globulin (SHBG)                     | SHBG              |
